# Supplementary material
Source: HighWire-hosted journal article supplement (https://bmjpaedsopen.bmj.com/content/2/1/e000310)
Supplement: inline-supplementary-material-1 [file inline-supplementary-material-1.docx]

**SUPPLEMENTAL FILES:**

**Supplemental File1:** Domains of data collection and related variables

|  | Domains | Variables |
| --- | --- | --- |
| 1 | General Patient Information | Date and Time of Arrival |
| Date and Time of Injury |
| Age and Sex |
| Nationality |
| Occupation and Education |
| 2 | Pre-Hospital Care | Mode of Arrival |
| Care provided at the scene of injury |
| Pre-hospital care provider |
| 3 | Pre-hospital assessment | Pre-hospital vital signs |
| Ambulance Triage code |
| 4 | Injury details | Location and Place of Occurrence |
| Mechanism of Injury |
| External Causes of Injury |
| Injured road user |
| Safety Equipment |
| 5 | ED Assessment | ED Vital Signs |
| Trauma team Activation |
| ED investigations |
| Confirmed or suspected alcohol/ substance use |
| 6 | ED Treatment | ED treatment (Meds, Airway control, Thoracostomy, CPR etc.) |
| Blood Transfusion |
| 7 | ED Disposition | Admitted |
| Discharged (Expired, sent home, AMA, referred) |
| Time of Exit from ED, ED length of stay |
| 8 | ICD 10 Injury Codes | ICD- 10 Injury codes |
| 9 | Inpatient care | Blood products |
| ICU length of stay |
| Operative Procedures |
| Complications |
| 10 | Injury Severity Score | Head and neck |
| Face |
| Chest Thorax Spine |
| Abdomen Pelvis Lumbar |
| Extremities |
| External |
| 11 | Discharge Details | Final Disposition |
| Date and time of discharge, Overall length of stay |

Where ED: Emergency Department, CPR: cardiopulmonary resuscitation, ICD 10: International Classification of Diseases, 10th version, ICU: Intensive care unit; AMA: Against medical advice

**Supplemental File 2:** Distribution of injury causes across age groups for children less than 15 years of age

| **External cause** | **Age group, N (%)** | | | |
| --- | --- | --- | --- | --- |
| < 1 year | 1 – 5 years | 5 – 9 years | ≥10 years |
| Transport injuries | 13 (7.10) | 26 (8.97) | 12 (8.11) | 37 (21.39) |
| Falls | 81 (44.26) | 161 (55.52) | 85 (57.43) | 78 (45.09) |
| Exposure to inanimate mechanical  Forces | 27 (14.75) | 58 (20.00) | 37 (25.00) | 38 (21.97) |
| Bites / exposure to animate mechanical forces | 1 (0.55) | 4 (1.38) | 2 (1.35) | 2 (1.16) |
| Drowning and submersion | 1 (0.55) | 2 (0.69) | 0 (0.00) | 0 (0.00) |
| Accidental suffocation and strangulation | 3 (1.64) | 1 (0.34) | 0 (0.00) | 0 (0.00) |
| Exposure to smoke, fire and flames | 5 (2.73) | 5 (1.72) | 3 (2.03) | 4 (2.31) |
| Contact with heat and hot substances | 42 (22.95) | 23 (7.93) | 4 (2.70) | 4 (2.31) |
| Contact with venomous animals and plants | 0 (0.00) | 2 (0.69) | 0 (0.00) | 1 (0.58) |
| Accidental poisoning and exposure to noxious substances | 6 (3.28) | 5 (1.72) | 1 (0.68) | 0 (0.00) |
| Intentional self-harm | 0 (0.00) | 0 (0.00) | 0 (0.00) | 1 (0.58) |
| Assault | 1 (0.55) | 0 (0.00) | 2 (1.35) | 8 (4.62) |
| Others | 3 (1.64) | 3 (1.03) | 2 (1.35) | 0 (0.00) |

Supplemental File 3: External causes of injuries affecting different body parts

| **External cause** | **Body part affected** | | | | | | | | | | |
| --- | --- | --- | --- | --- | --- | --- | --- | --- | --- | --- | --- |
|  | Head | Neck | Thorax | Abdomen, back, pelvis | Shoulder, upper arm | Elbow, fore arm | Wrist, hand | Hip, thigh | Knee, leg | Ankle, foot | Multiple injuries |
| Transport injuries | 60 | 8 | 17 | 18 | 6 | 15 | 5 | 13 | 21 | 16 | 9 |
| Falls | 232 | 10 | 8 | 21 | 53 | 54 | 7 | 27 | 21 | 10 | 1 |
| Exposure to inanimate  Mechanical forces | 1 | 3 | 1 | 5 | 1 | 4 | 74 | 5 | 8 | 19 | 1 |
| Bites / exposure to animate mechanical forces | 0 | 0 | 0 | 2 | 1 | 1 | 1 | 1 | 0 | 0 | 0 |
| Drowning and submersion | 0 | 0 | 0 | 0 | 0 | 0 | 0 | 0 | 0 | 0 | 0 |
| Accidental suffocation and strangulation | 0 | 2 | 0 | 0 | 0 | 0 | 0 | 0 | 0 | 0 | 0 |
| Exposure to smoke, fire and flames | 0 | 0 | 0 | 0 | 0 | 0 | 0 | 0 | 0 | 0 | 0 |
| Contact with heat and hot substances | 0 | 0 | 0 | 0 | 0 | 0 | 1 | 0 | 0 | 1 | 0 |
| Contact with venomous animals and plants | 0 | 0 | 0 | 0 | 0 | 0 | 0 | 0 | 0 | 0 | 0 |
| Accidental poisoning and exposure to noxious substances | 4 | 0 | 0 | 0 | 0 | 0 | 0 | 0 | 0 | 0 | 0 |
| Intentional self-harm | 0 | 0 | 0 | 0 | 0 | 0 | 0 | 0 | 0 | 0 | 0 |
| Assault | 5 | 2 | 1 | 2 | 2 | 2 | 1 | 6 | 6 | 5 | 0 |
| Others | 5 | 0 | 0 | 0 | 0 | 1 | 1 | 1 | 0 | 0 | 0 |
| Total | 344 | 25 | 27 | 48 | 63 | 77 | 90 | 53 | 56 | 51 | 11 |
